# Supplementary material for: Role of phospholipase A2 receptor 1 antibody level at diagnosis for long-term renal outcome in membranous nephropathy
Source: PLoS One. 2019 Sep 9;14(9):e0221293. doi: 10.1371/journal.pone.0221293 (PMC6733455; doi:10.1371/journal.pone.0221293)
Supplement: S4 Table — In the analyses of independent variables measured at baseline we adjusted the analysis for potential time-varying effects during follow-up. In this table we present results of each variable both with, and without adjusting for these time-dependent effects. Unadjusted analyses consider only a main effect term for each variable. Analyses of baseline variables which were adjusted for time-varying effects consider a main effect term (reflecting the initial effect of the variable) and a time-dependent term (reflecting the change of the variable effect during time). In the analysis of “use of immunosuppressive treatment” when adjusting for time-varying effects we consider only a time-dependent term (reflecting the effect of the variable from the time when the event occurs–immunosuppression is started). 95% Conf. Interval: 95% Confidence Interval; PLA2R1-ab: PLA2R1-antibody; Time-dep.: time-dependent. (DOCX) [file pone.0221293.s007.docx]

**S4 Table. Univariate Cox regression analysis for relapse of PLA2R1-ab.**

| **Variable** | **Analysis is adjusted for time-dependent effects** | **Term** | **Hazard Ratio** | **95% Conf. Interval** | | **P-value** |
| --- | --- | --- | --- | --- | --- | --- |
| **Lower** | **Upper** |
| **Log2(PLA2R1-ab level)** | No | Main effect | 1.10 | 1.00 | 1.20 | 0.05 |
| Yes | Main effect | 1.14 | 1.01 | 1.28 | 0.04 |
| Yes | Time-dep. | 1.00 | 0.99 | 1.00 | 0.3 |
| **Log2(Proteinuria)** | No | Main effect | 0.89 | 0.74 | 1.06 | 0.2 |
| Yes | Main effect | 0.84 | 0.66 | 1.06 | 0.1 |
| Yes | Time-dep. | 1.00 | 0.99 | 1.02 | 0.5 |
| **Log2(Serum creatinine)** | No | Main effect | 0.94 | 0.68 | 1.29 | 0.7 |
| Yes | Main effect | 1.00 | 0.67 | 1.50 | 0.9 |
| Yes | Time-dep. | 1.00 | 0.98 | 1.01 | 0.6 |
| **Age** | No | Main effect | 1.00 | 0.99 | 1.02 | 0.4 |
| Yes | Main effect | 1.00 | 0.99 | 1.02 | 0.8 |
| Yes | Time-dep. | 1.00 | 1.00 | 1.00 | 0.6 |
| **Sex** | No | Main effect | 1.24 | 0.82 | 1.87 | 0.3 |
| Yes | Main effect | 1.07 | 0.64 | 1.79 | 0.8 |
| Yes | Time-dep. | 1.01 | 0.99 | 1.04 | 0.4 |
| **Log2(Time between renal biopsy and study enrolment)** | No | Main effect | 0.95 | 0.86 | 1.04 | 0.3 |
| Yes | Main effect | 1.00 | 0.88 | 1.13 | 0.9 |
| Yes | Time-dep. | 1.00 | 0.99 | 1.00 | 0.2 |
| **Use of immunosuppressive treatment** | No | Main effect | 1.17 | 0.74 | 1.85 | 0.5 |
| Yes | Time-dep. | 2.42 | 1.24 | 4.74 | 0.01 |

In the analyses of independent variables measured at baseline we adjusted the analysis for potential time-varying effects during follow-up. In this table we present results of each variable both with, and without adjusting for these time-dependent effects. Unadjusted analyses consider only a main effect term for each variable. Analyses of baseline variables which were adjusted for time-varying effects consider a main effect term (reflecting the initial effect of the variable) and a time-dependent term (reflecting the change of the variable effect during time). In the analysis of “use of immunosuppressive treatment” when adjusting for time-varying effects we consider only a time-dependent term (reflecting the effect of the variable from the time when the event occurs – immunosuppression is started). 95% Conf. Interval: 95% Confidence Interval; PLA2R1-ab: PLA2R1-antibody; Time-dep.: time-dependent.
